# Supplementary material for: The high protein expression of FOXO3, but not that of FOXO1, is associated with markers of good prognosis
Source: PubMed Central journal article supplement (PMC7181619; doi:10.1038/s41598-020-63895-8), 2020-04-24
Supplement: 41598_2020_63895_MOESM1_ESM.pdf [file 41598_2020_63895_MOESM1_ESM.pdf]

**The high protein expression of FOXO3, but not that of FOXO1, is associated with markers of good prognosis.**

François Lallemand, Sophie Vacher, Leanne de Koning, Ambre Petitalot, Adrien Briaux, Keltouma Driouch, Céline Callens, Anne Schnitzler, Caroline Lecerf, Floriane Oulie-Bard, Aurélie Barbet, Anne Vincent, Sophie Zinn-Justin, Bernard S. Lopez, Rosette Lidereau, Ivan Bieche, and Sandrine M. Caputo.

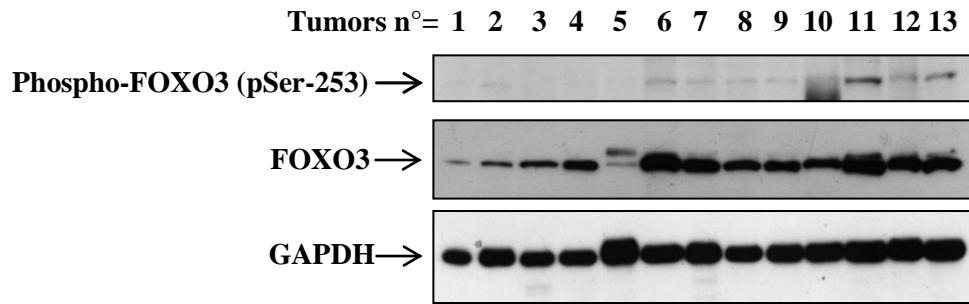

**Figure S1:** FOXO3 and Phospho-FOXO3 (ser-253) expressions in breast tumors. Breast tumor extracts were analysed by immunoblotting for their expressions of FOXO3, Phospho-FOXO3 (Ser-253), and GAPDH (loading control).

**Table S1: Characteristics of the 218 breast tumours**

|                                              | Number of patients (%) | Number with metastases (%) | <i>p</i> -value <sup>a</sup> |
|----------------------------------------------|------------------------|----------------------------|------------------------------|
| <i>Total</i>                                 | 218 (100)              | 100 (45.9)                 |                              |
| <i>Age</i>                                   |                        |                            |                              |
| ≤50                                          | 54 (24.8)              | 27 (50.0)                  | 0.35 (NS)                    |
| >50                                          | 164 (75.2)             | 73 (44.5)                  |                              |
| <i>SBR histological grade</i> <sup>b,c</sup> |                        |                            |                              |
| I                                            | 22 (10.4)              | 7 (31.8)                   | 0.22 (NS)                    |
| II                                           | 86 (40.8)              | 41 (47.7)                  |                              |
| III                                          | 103 (48.8)             | 51 (49.5)                  |                              |
| <i>Lymph node status</i> <sup>d</sup>        |                        |                            |                              |
| 0                                            | 69 (31.9)              | 20 (29.0)                  | < <b>0.0001</b>              |
| 1-3                                          | 84 (38.9)              | 37 (44.0)                  |                              |
| >3                                           | 63 (29.2)              | 42 (66.7)                  |                              |
| <i>Macroscopic tumor size</i> <sup>e</sup>   |                        |                            |                              |
| ≤25mm                                        | 82 (38.5)              | 26 (31.7)                  | <b>0.0009</b>                |
| >25mm                                        | 131 (61.5)             | 73 (55.7)                  |                              |
| <i>ERα status</i>                            |                        |                            |                              |
| Negative                                     | 89 (40.8)              | 42 (47.2)                  | 0.34 (NS)                    |
| Positive                                     | 129 (59.2)             | 58 (45.0)                  |                              |
| <i>PR status</i>                             |                        |                            |                              |
| Negative                                     | 117 (53.7)             | 56 (47.9)                  | 0.24 (NS)                    |
| Positive                                     | 101 (46.3)             | 44 (43.6)                  |                              |
| <i>ERBB2 status</i>                          |                        |                            |                              |
| Negative                                     | 156 (71.6)             | 68 (43.6)                  | 0.18 (NS)                    |
| Positive                                     | 62 (28.4)              | 32 (51.6)                  |                              |
| <i>Molecular subtypes</i>                    |                        |                            |                              |
| HR- ERBB2-                                   | 44 (20.2)              | 17 (38.6)                  | 0.12 (NS)                    |
| HR- ERBB2+                                   | 42 (19.3)              | 24 (57.1)                  |                              |
| HR+ ERBB2-                                   | 112 (51.4)             | 51 (45.5)                  |                              |
| HR+ ERBB2+                                   | 20 (9.2)               | 8 (40.0)                   |                              |

NS: not significant.

<sup>a</sup> Log-rank test.

<sup>b</sup> Scarff Bloom Richardson classification.

<sup>c</sup> Information available for 211 patients.

<sup>d</sup> Information available for 216 patients.

<sup>e</sup> Information available for 213 patients.

**Table S2: mRNA expression levels of *FOXO1*, *FOXO3*, *FOXO4* and *FOXO6* in normal breast samples and in the series of 218 breast tumours**

|                                  | n=  | <i>FOXO1</i>       | <i>FOXO3</i>     | <i>FOXO4</i>       | <i>FOXO6</i>       |
|----------------------------------|-----|--------------------|------------------|--------------------|--------------------|
| <i>Normals</i>                   |     |                    |                  |                    |                    |
| Median (range)                   | 15  | 1.0 (0.51-1.85)    | 1.0 (0.71-1.86)  | 1.0 (0.44-1.49)    | 1.0 (0.36-2.34)    |
| Under-expressed (%) <sup>a</sup> |     | 0 (0)              | 0 (0)            | 0 (0)              | 0 (0)              |
| Over-expressed (%) <sup>a</sup>  |     | 0 (0)              | 0 (0)            | 0 (0)              | 0 (0)              |
| <i>Total population</i>          |     |                    |                  |                    |                    |
| Median (range)                   | 218 | 0.41 (0.04-1.36)   | 1.14 (0.31-7.88) | 0.59 (0.14-3.32)   | 1.77 (0.19-23.1)   |
| Under-expressed (%) <sup>a</sup> |     | 73 (33.5)          | 1 (0.5)          | 30 (13.8)          | 4 (1.8)            |
| Over-expressed (%) <sup>a</sup>  |     | 0 (0)              | 9 (4.1)          | 1 (0.5)            | 51 (23.4)          |
| <i>p</i> -value <sup>b</sup>     |     | <b>&lt; 0.0001</b> | 0.55 (NS)        | <b>0.0002</b>      | <b>0.0004</b>      |
| <i>HR- ERBB2-</i>                |     |                    |                  |                    |                    |
| Median (range)                   | 44  | 0.45 (0.13-1.36)   | 1.26 (0.49-6.59) | 0.56 (0.14-3.32)   | 1.29 (0.19-7.74)   |
| Under-expressed (%) <sup>a</sup> |     | 14 (31.8)          | 0 (0)            | 11 (25.0)          | 4 (9.1)            |
| Over-expressed (%) <sup>a</sup>  |     | 0 (0)              | 4 (9.1)          | 1 (2.3)            | 7 (15.9)           |
| <i>p</i> -value <sup>b</sup>     |     | <b>&lt; 0.0001</b> | 0.12 (NS)        | <b>0.0073</b>      | 0.18 (NS)          |
| <i>HR- ERBB2+</i>                |     |                    |                  |                    |                    |
| Median (range)                   | 42  | 0.55 (0.07-1.28)   | 1.17 (0.41-4.67) | 0.54 (0.15-2.90)   | 1.75 (0.47-11.1)   |
| Under-expressed (%) <sup>a</sup> |     | 11 (26.2)          | 0 (0)            | 7 (16.7)           | 0 (0)              |
| Over-expressed (%) <sup>a</sup>  |     | 0 (0)              | 3 (7.1)          | 0 (0)              | 9 (21.4)           |
| <i>p</i> -value <sup>b</sup>     |     | <b>0.0002</b>      | 0.36 (NS)        | <b>0.0002</b>      | <b>0.0005</b>      |
| <i>HR+ ERBB2-</i>                |     |                    |                  |                    |                    |
| Median (range)                   | 112 | 0.38 (0.04-1.28)   | 1.01 (0.31-4.43) | 0.58 (0.14-1.81)   | 1.82 (0.38-18.4)   |
| Under-expressed (%) <sup>a</sup> |     | 43 (38.4)          | 1 (0.9)          | 10 (8.9)           | 0 (0)              |
| Over-expressed (%) <sup>a</sup>  |     | 0 (0)              | 1 (0.9)          | 0 (0)              | 28 (25.0)          |
| <i>p</i> -value <sup>b</sup>     |     | <b>&lt; 0.0001</b> | 0.67 (NS)        | <b>&lt; 0.0001</b> | <b>&lt; 0.0001</b> |
| <i>HR+ ERBB2+</i>                |     |                    |                  |                    |                    |
| Median (range)                   | 20  | 0.46 (0.18-1.14)   | 1.39 (0.78-7.88) | 0.86 (0.20-2.45)   | 2.43 (0.62-23.1)   |
| Under-expressed (%) <sup>a</sup> |     | 5 (25.0)           | 0 (0)            | 2 (10.0)           | 0 (0)              |
| Over-expressed (%) <sup>a</sup>  |     | 0 (0)              | 1 (5.0)          | 0 (0)              | 7 (35.0)           |
| <i>p</i> -value <sup>b</sup>     |     | <b>0.0001</b>      | <b>0.015</b>     | 0.49 (NS)          | <b>0.0001</b>      |

mRNA expression levels were normalized so that the median of values for normal breast tissues (n=15) was 1. <sup>a</sup> Over- and under-expressions were defined as threefold variations of expression relative to the median expression of normal samples. <sup>b</sup> Mann-Whitney test relative to normals.

**Supplemental Table S3: Multivariate COX analysis of MFS for FOXO3 protein level in the series of 218 breast tumours**

| Characteristics               |        | HR <sup>a</sup> | 95% CI <sup>b</sup> | <i>p</i> -value <sup>c</sup> |
|-------------------------------|--------|-----------------|---------------------|------------------------------|
| <i>Lymph node status</i>      | 0      | 1               |                     | <b>&lt; 0.0001</b>           |
|                               | 1-3    | 1.75            | 1.34-2.28           |                              |
|                               | > 3    | 3.07            | 1.81-5.21           |                              |
| <i>Macroscopic tumor size</i> | ≤ 25mm | 1               |                     | <b>0.0037</b>                |
|                               | > 25mm | 1.97            | 1.24-3.11           |                              |
| <i>FOXO3 protein level</i>    | Low    | 1               |                     | <b>0.0055</b>                |
|                               | High   | 0.55            | 0.36-0.84           |                              |

<sup>a</sup> Hazard ratio.

<sup>b</sup> 95% Confidential Interval.

<sup>c</sup> Multivariate COX analysis.

**Supplemental Table S4: Antibodies used in this study**

| <b>Antibody</b>               | <b>From</b>         | <b>Ref.</b> |
|-------------------------------|---------------------|-------------|
| Phospho-S6K (Thr-421/Ser-424) | Upstate (Millipore) | 04-393      |
| Phospho-S6K (Thr-389)         | Upstate (Millipoe)  | 04-392      |
| Phospho-S6 Rib (Ser-235/236)  | CST                 | 2211        |
| Phospho-S6 Rib (Ser-240/244)  | CST                 | 2215        |
| AKT                           | CST                 | 9272        |
| PDK1                          | CST                 | 5662        |
| mTor                          | Abcam               | Ab51089     |
| S6 Rib                        | CST                 | 2212        |
| IRS1                          | Upstate (Millipoe)  | 06-248      |
| Ku80                          | CST                 | 2180        |
| DNA.PK                        | Upstate (Millipoe)  | 05-907      |
| PARP                          | Epitomics           | 1077-1      |
| NBS1                          | CST                 | 3002        |
| RAD50                         | CST                 | 3427        |
| Mre11                         | CST                 | 4847        |
| p15                           | CST                 | 4822        |
| p53                           | CST                 | 9282        |
| Phospho-p53 (Ser-15)          | CST                 | 9286        |
| Phospho-p53 (Ser-392)         | Epitomics           | 2326-1      |
| KI67                          | Dako                | M7240       |
| FOXO1                         | CST                 | 2880        |
| FOXO3                         | CST                 | 9467        |
